# Supplementary material for: HDAC Inhibition Increases HLA Class I Expression in Uveal Melanoma
Source: PubMed Central journal article supplement (PMC7763827; doi:10.3390/cancers12123690), 2020-12-09
Supplement: cancers-12-03690-s001.pdf [file cancers-12-03690-s001.pdf]

Supplementary materials

# HDAC Inhibition Increases HLA Class I Expression in Uveal Melanoma

Zahra Souri <sup>1</sup>, Aart G. Jochemsen <sup>2</sup>, Mieke Versluis <sup>1</sup>, Annemijn P.A. Wierenga <sup>1</sup>, Fariba Nemati <sup>3</sup>, Pieter A. van der Velden <sup>1</sup>, Wilma G.M. Kroes <sup>4</sup>, Robert M. Verdijk <sup>5,6</sup>, Gregorius P.M. Luyten <sup>1</sup> and Martine J. Jager <sup>1,\*</sup>

<sup>1</sup> Department of Ophthalmology, LUMC, Albinusdreef 2, 2333 ZA Leiden, The Netherlands; z.souri@lumc.nl (Z.S.); m.versluis@lumc.nl (M.V.); a.p.a.wierenga@lumc.nl (A.P.A.W.); p.a.van\_der\_velden@lumc.nl (P.A.v.d.V.); g.p.m.luyten@lumc.nl (G.P.M.L.)

<sup>2</sup> Department of Cell and Chemical Biology, LUMC, 2333 ZA Leiden, The Netherlands; a.g.jochemsen@lumc.nl

<sup>3</sup> Laboratory of preclinical investigation, Department of Translational Research, Institut Curie, PSL University, 75248 Paris, France; fariba.nemati@curie.fr

<sup>4</sup> Department of Clinical Genetics, LUMC, 2333 ZA Leiden, The Netherlands; w.g.m.kroes@lumc.nl

<sup>5</sup> Department of Pathology, LUMC, 2333 ZA Leiden, The Netherlands; r.m.verdijk@lumc.nl

<sup>6</sup> Department of Pathology, Section Ophthalmic Pathology, ErasmusMC, Dr Molewaterplein 40, 3015 GD Rotterdam, The Netherlands

\* Correspondence: m.j.jager@lumc.nl

Received: 12 November 2020; Accepted: 07 December 2020; Published: 09 December 2020

## Supplementary materials

**Table S1.** Gene expression (Illumina) Probe Number in an Illumina HT12v4 array and mean expression of the genes used in this study.

| Gene of interest | Illumina probe number | Mean expression ± SD |
|------------------|-----------------------|----------------------|
| HLA-A probe 1    | ILMN_1671054          | 11.40 ± 0.90         |
| HLA-A probe 2    | ILMN_2203950          | 13.84 ± 0.77         |
| HLA-A probe 3    | ILMN_2186806          | 10.71 ± 1.45         |
| HLA-B            | ILMN_1778401          | 11.33 ± 1.67         |
| HDAC1            | ILMN_1727458          | 10.18 ± 0.45         |
| HDAC2            | ILMN_1767747          | 9.28 ± 0.48          |
| HDAC3            | ILMN_1772455          | 8.49 ± 0.20          |
| HDAC4            | ILMN_1764396          | 7.57 ± 0.39          |
| HDAC5 probe 1    | ILMN_2388166          | 6.52 ± 0.10          |
| HDAC5 probe 2    | ILMN_1810856          | 6.63 ± 0.13          |
| HDAC6            | ILMN_1798546          | 7.94 ± 0.26          |
| HDAC7 probe 1    | ILMN_3266186          | 6.86 ± 0.20          |
| HDAC7 probe 2    | ILMN_1728521          | 6.89 ± 0.21          |
| HDAC8            | ILMN_1651544          | 6.85 ± 0.24          |
| HDAC9            | ILMN_2408885          | 6.68 ± 0.12          |
| HDAC11           | ILMN_1684690          | 7.49 ± 0.40          |
| EZH2             | ILMN_1708105          | 6.65 ± 0.15          |

**Table S2.** Sequences of PCR primers used in this study.

| Primers | Forward                    | Reverse                 |
|---------|----------------------------|-------------------------|
| HLA-A   | 5'- TGTGTTCTGTAGGCATA      | 5'- TTGAGACAGAGATGGAGAC |
| HLA-B   | 5'- CTCCATCTCTGTCTCAACTT   | 5'- CATCAACCTCTCATAGCA  |
| RPS11   | 5'- AAGCAGCCGACCATCTTTCA   | 5'- CGGGAGCTTCTCCTTGCC  |
| CAPNS1  | 5'- ATGGTTTTGGCATTGACACATG | 5'- GCTTGCCTGTGGTGTCTGC |
| SRPR    | 5'- CATTGCTTTGCACGTAACCA   | 5'- ATTGCTTGCATGCGGCC   |
